For submission to: Chemosphere

**Title: Impact of Microbial Iron Oxide Reduction on the Transport of Diffusible Tracers and Non-diffusible Nanoparticles in Soils**

**Authors: Xiaolong Liang<sup>a</sup>, Mark Radosevich<sup>a</sup>, Frank Löffler<sup>a,b,c</sup>, Sean M. Schaeffer<sup>a</sup>, and Jie Zhuang<sup>a,\*</sup>**

Addresses:

<sup>a</sup>Department of Biosystems Engineering and Soil Science, The University of Tennessee, Knoxville, TN 37996, USA

<sup>b</sup>Department of Microbiology, Department of Civil and Environmental Engineering, Center for Environmental Biotechnology, The University of Tennessee, Knoxville, TN 37996, USA

<sup>c</sup>Biosciences Division, Oak Ridge National Laboratory, Oak Ridge, TN 37831, USA

Address correspondence to Jie Zhuang: [jzhuang@utk.edu](mailto:jzhuang@utk.edu)

Key words: Biostimulation, iron reduction, nanoparticles, transport, soil aggregates

**Highlights**

- Fe(III)-bioreduction causes time-dependent aggregate breakdown and colloid release.
- Short-term bioreduction alters soil aggregate surface chemistry and tracer transport.
- Electron donor amendment enhances transport of nanoparticle tracer.

## 1 **Abstract**

2 *In situ* bioremediation to achieve immobilization of toxic metals and radionuclides or  
3 detoxification of chlorinated solvents relies on electron donor additions. This practice promotes  
4 microbial Fe(III)-oxide mineral reduction that could change soil pore structure, release soil  
5 colloids, alter matrix surface properties, and cause the formation of secondary (i.e., reduced) Fe-  
6 mineral phases. These processes in turn may impact rates of bioremediation, groundwater  
7 quality, and ultimately contaminant fate. Continuous flow columns packed with water-stable soil  
8 aggregates high in Fe-oxides were infused with artificial groundwater containing acetate as  
9 electron donor and operated for 20 or 60 days inside an anoxic chamber. Soluble Fe(II) and soil  
10 colloids were detected in the effluent within one week after initiation of the acetate addition,  
11 demonstrating Fe(III)-bioreduction and colloid formation. Br<sup>-</sup>, 2,6-difluorobenzoate (DFBA),  
12 and silica-shelled silver nanoparticles (SSSNP) were selected as diffusible tracer, low-diffusible  
13 tracer, and non-diffusible nanoparticles, respectively, to perform transport experiments before  
14 and after the active 20-day bioreduction phase, with an aim of assessing the changes in soil  
15 structure and surface chemical properties resulting from Fe(III)-bioreduction. The transport of  
16 diffusible Br<sup>-</sup> was not influenced by the Fe(III)-bioreduction as evidenced by identical  
17 breakthrough curves before and after the introduction of acetate. Low-diffusible DFBA showed  
18 earlier breakthrough and less tailing after the bioreduction, suggesting alterations in flow paths  
19 and surface chemical properties of the soils. Similarly, non-diffusible SSSNP exhibited early  
20 breakthrough and enhanced transport after the bioreduction phase. Unexpectedly, the  
21 bioreduction caused complete retention of SSSNP in the soil columns when the acetate injection  
22 was extended from 20 days to 60 days, though no changes were observed for Br<sup>-</sup> and DFBA  
23 during the extended bioreduction period. The large change in the transport of SSSNP was  
24 attributed to the enhancement of soil aggregate breakdown and soil colloid release causing

25 mechanical straining of SSSNP and the exposure of iron oxide surfaces previously unavailable  
26 within aggregate interiors favorable to the attachment of SSSNP. These results demonstrate that  
27 microbial activity can affect soil properties and transport behaviors of diffusivity-varying solutes  
28 and colloids in a time dependent fashion, a finding with implication for interpreting the data  
29 generated from soil column experiments under continuous flow.  
30

## 31 1. Introduction

32 Subsurface bioremediation brought about by electron donor addition creates anoxic conditions  
33 that stimulate the growth of iron reducing and/or sulfate reducing bacteria (Chapelle and Lovley,  
34 1992; Si et al., 2015). Subsequently, oxidized forms of iron are reduced to Fe(II), solubilizing  
35 iron oxide minerals. The soluble Fe(II) and secondary precipitation of iron (e.g., ferrous  
36 hydroxide) can result in abiotic transformation of contaminants and/or the release of colloidal  
37 clay and iron mineral colloids (Pedersen et al., 2006; Thompson et al., 2006). Adsorption of  
38 contaminants to these colloids may enhance contaminant transport via colloid-facilitated  
39 transport (Bose and Sharma, 2002; Zhuang et al., 2003). Additionally, biomass increase and  
40 colloid production can cause pore clogging, potentially reducing hydraulic conductivity of the  
41 porous medium down gradient from the treatment zone. Alternatively, advective flow paths and  
42 increased hydraulic conductivity may trigger substantial soil aggregate breakdown. Thus,  
43 altering the indigenous properties of subsurface media may impact coupled processes controlling  
44 the fate and transport of contaminants, and cause unintended secondary impacts on the properties  
45 of the porous media and groundwater quality (e.g. secondary mineral precipitates, permeability,  
46 and microbial activity).

47 Anaerobic bioremediation is an attractive technology for subsurface soil and water  
48 remediation based on cost and effectiveness (Ellis et al., 2000; Coates and Anderson, 2000;  
49 Liang et al., 2017). The technology generally aims to create anoxic conditions via addition of  
50 soluble electron donors, such as acetate and lactate or higher molecular weight substrates, for  
51 stimulating microorganisms that degrade organic contaminants (e.g. chlorinated solvents) and  
52 reduce heavy metals and radionuclides to insoluble forms thereby immobilizing them *in situ*  
53 (Aulenta et al., 2006). Once anoxic conditions are achieved, anaerobic respiration with available

54 electron acceptors is stimulated leading to biologically-mediated reduction of Fe(III)-oxide  
55 minerals (the most common mineral oxide of soils and subsurface environments) and the  
56 formation of soluble Fe(II) (Caldwell et al., 1999; Weber et al., 2006; Mejia et al., 2016). Iron  
57 oxides, which have diverse crystallinities and reactivity (e.g. ferrihydrite, goethite, lepidocrocite,  
58 and hematite), are extensively present in soils (Pedersen et al., 2006; Vink et al., 2017). The  
59 indigenous iron oxides serve a very important role as aggregating agents that “cement” clay  
60 particles together into aggregates (Goldberg et al., 1990; Braunschweig et al., 2013). Reduction  
61 of Fe(III)-oxides under anoxic conditions may cause disintegration of soil aggregates and  
62 generate mobile colloids (Hansel et al., 2005; De-Campos et al., 2009). These processes may  
63 disrupt pore structure and alter pore connectivity, flow paths, and permeability (Guan et al.,  
64 2017). These alterations could either promote or inhibit the transport of solutes and colloids.  
65 Schaidler et al. (2014) found that iron oxide aggregates can alter the transport of particulate  
66 particles and sequester metals. The formation and mobilization of colloids can act as vectors to  
67 facilitate co-transport of solutes and toxic metals in soils and groundwater (McCarthy and  
68 McKay, 2004; Maurice and Hocella, 2008; Guan et al., 2017). The reduction of Fe(III)-oxides  
69 may also change soil surface properties to influence the reactive transport processes (Hansel et  
70 al., 2003; Jardine, 2008).

71 Transport of solutes and colloids in soil is influenced by the pore structure and surface  
72 chemistry of soils, solution chemistry, and hydrological conditions (Zhuang et al., 2005; 2007;  
73 2010; Bradford and Torkzaban, 2008; Mohanty et al., 2016; Pachapur et al., 2016). The  
74 influencing mechanisms have been well examined at varying scales from laboratory columns  
75 (repacked or undisturbed) to field scale (McKay et al., 2000; Arora et al., 2015; Karadimitriou et  
76 al., 2017). Bioremediation treatment may alter aquifer porosity, flow paths, and mineral

77 interfacial properties and in turn change the attenuation and migration of solutes, colloids, and  
78 microbial cells; all these may exert feedback effects on microbial bioremediation.  
79 Microorganisms, nutrients, or electron donors are generally applied to accelerate in situ  
80 bioremediation (Ellis et al., 2000; Lovley 2003; Moon et al., 2017), yet the remediation  
81 efficiency is subject to their mobility in porous media (Song et al., 2017). Thus far, few studies  
82 have addressed the impacts of biostimulation on the transport of solutes and colloids, making  
83 difficult to resolve the low-efficiency problem of bioremediation under field conditions.  
84 Therefore, in-depth investigations are needed to understand the potential that biostimulation  
85 influences the mobility of solutes and colloids including microorganisms.

86         The objective of this research was to assess the impact of biologically-mediated Fe(III)-  
87 oxide reduction on the transport of solutes and colloids with respect to soil structure breakdown  
88 under saturated flow conditions, shedding light on the interplays of microbial activities with the  
89 solutes and colloids migration during bioremediation processes. Breakthrough tests with  
90 diffusivity-varying tracers and non-diffusing nanoparticles both before and after acetate-  
91 stimulated Fe(III)-bioreduction were conducted to evaluate the alteration of soil surface  
92 chemistry and flow pathways. The research provides significant insights into the feedback effects  
93 of anoxic bioremediation on the transport of solutes and colloids, microbial distribution, and soil  
94 aggregate structure.

## 95 **2. Materials and methods**

### 96 *2.1 Porous media*

97         The columns were packed with different porous media, including uncoated and goethite-  
98 coated silica sand and water-stable soil aggregates extracted from an iron oxide-rich natural soil.

99 The sand grains had a median diameter ( $d_{50}$ ) of  $0.25 \pm 0.01$  mm with a trade name Accusand  
100 (Grade 50/70, Unimin Corporation, New Canaan, CT, USA). Prior to coating with goethite, the  
101 sand was chemically treated to remove natural metal oxides from the grains following the  
102 established procedure (Zhuang and Jin, 2003). Goethite synthesis and coating on the cleaned  
103 sand were performed as described by Zhuang and Jin (2008). The natural soil was collected from  
104 an eroded agricultural site mapped as the Decatur silty clay loam. The Decatur series is a fine,  
105 kaolinitic, thermic rhodic Paleudults. Soil aggregates were extracted by wet sieving of the bulk  
106 soils through 2,000, 250, and 53  $\mu\text{m}$  sieves using the modified method as described in Zhuang et  
107 al. (2008). Two fractions of water-stable soil aggregates, microaggregates (53-250  $\mu\text{m}$ ) and  
108 macroaggregates (250-2000  $\mu\text{m}$ ), were obtained and then air-dried for experimental use. The  
109 citrate-bicarbonate-dithionite extractable iron (Mehra and Jackson, 1960) of the bulk soil,  
110 microaggregates, and macroaggregates were 5.5%, 4.7% and 5.2% (w/w), respectively, as  
111 measured using the ferrozine method (Viollier et al., 2000).

## 112 *2.2 Tracers and nanoparticles*

113 Two diffusible tracers and one non-diffusing nanoparticle were used for transport  
114 experiments, including bromide ( $\text{Br}^-$  in KBr) (ionic diffusible tracer), 2,6-difluorobenzoate  
115 (DFBA) (molecular diffusible tracer with lower diffusivity than  $\text{Br}^-$ ) (Mayes et al., 2003), and  
116 silica-shelled silver nanoparticles (SSSNP) (non-diffusible particle). The SSSNP was purchased  
117 from nanoComposix (<http://nanocomposix.com/>) and has a core of silver nanoparticles with  
118 average diameter of 106 nm. The silver cores are encased in a shell of silica with average  
119 thickness of 22 nm, resulting in a total particle diameter of 150 nm. The SSSNP were negatively  
120 charged, with a measured zeta potential of -5.7 mV at pH 8. SSSNP were specifically selected as  
121 a “non-diffusing” particle and potentially as a non-reactive particle given the silica shell

122 surrounding the silver-core. Advantages to using these shelled particles instead of other  
123 previously used particle tracers, such as viruses (e.g., MS-2), are their resistance to biotic and  
124 abiotic breakdown, the ease and accuracy of quantification in the effluent samples using graphite  
125 furnace atomic absorption spectroscopy, and the convenience to distinguish introduced SSSNP  
126 from native soil colloids for mechanistic understanding of transport processes.

### 127 *2.3 Bacterial strain, growth media, and inoculation for stimulated bioreduction*

128 *Geobacter* species, with capacity to oxidize organic compounds coupled with reduction of  
129 iron oxides or other metal minerals, are ubiquitous in subsurface environments (Caccavo et al.,  
130 1994). As such, *Geobacter*, and other microorganisms with similar metabolism have been  
131 extensively studied and used for anaerobic bioremediation (Lovley 2003; Moon et al., 2017). To  
132 ensure active Fe(III) bioreduction, the soil macroaggregates (250-2,000  $\mu\text{m}$ ) were inoculated  
133 with laboratory-grown culture of *Geobacter sulfurreducens* strain PCA (ATCC 51573; Caccavo  
134 et al., 1994) prior to packing the columns.

135 Specifically, *G. sulfurreducens* was grown in mineral salts medium containing 1.0 g of NaCl,  
136 0.5 g of  $\text{MgCl}_2$ , 0.2 g of  $\text{KH}_2\text{PO}_4$ , 0.3 g of  $\text{NH}_4\text{Cl}$ , 0.3 g of KCl, 0.015 g of  $\text{CaCl}_2$ , 1 mg of  
137 resazurin, and 2 ml of trace element solution, amended with 5 mM acetate and 10 mM ferric  
138 citrate per liter was prepared as described by Löffler et al. (1996). The prepared medium was  
139 boiled and transferred to serum bottles while flushing with oxygen-free 80/20 (v/v)  $\text{N}_2\text{-CO}_2$ , and  
140 the pH was adjusted to 7.2 with flow of  $\text{CO}_2$ . The serum bottles were autoclaved, and filter-  
141 sterilized (with a 0.22  $\mu\text{m}$  Millex filter syringe) acetate and ferric citrate were added to the  
142 medium to a final concentration of with 5 mM and 10 mM, separately. The serum bottles  
143 inoculated with *G. sulfurreducens* were cultured at 30 °C (Löffler et al., 1996). Once the cultures



144 reached stationary phase (3-5 d; optical density at 600 nm = 0.2 to 0.35; cell concentration of  
145 approximately  $1 \times 10^8$  cells per milliliter), 200 ml of culture suspension was centrifuged at 4,248  
146 g, and the bacterial pellet was resuspended in 15 ml of the growth medium in the anaerobic  
147 chamber with an 80/20 (v/v) N<sub>2</sub>/CO<sub>2</sub> atmosphere. Then, all the resuspended *G. sulfureducens*  
148 were uniformly sprayed onto 600 g of air-dried but non-sterile, water-stable soil  
149 macroaggregates that were thinly spread on a tray inside the anaerobic chamber. During the  
150 application of cell suspension, the aggregates were continuously mixed using a glass rod to  
151 achieve uniform inoculation of the bacteria.

#### 152 *2.4 Transport experiment*

153 All transport experiments were conducted in plexiglass (acrylic) columns (25 cm in length  
154 with an inside diameter of 3.8 cm) with input solution introduced from the bottom of the column  
155 in pulse input mode through a peristaltic pump at pore velocity of 24.4 cm/h. Teflon tubing was  
156 used throughout the system except for a portion of tygon tubing needed in the pump. The  
157 columns were fitted with five ports connected to pressure sensors (Honeywell Sensing and  
158 Control, Inc., USA), which were separated by 5-cm intervals along the column length. Real-time  
159 data of hydrostatic pressure were collected with data loggers of CR-1000 Measurement and  
160 Control Systems (Campbell Scientific, Inc., Logan Utah) to calculate hydraulic conductivity  
161 between different sections of the columns according to the difference in pressure. During the  
162 transport experiment, liquid effluent was collected from the top of the column into 20-mL glass  
163 tubes using Retriever II fraction collectors for determining the concentrations of tracers, iron,  
164 and or colloids as described in section 2.5. The protocols for column experiments are shown in  
165 supplementary materials (Table S1 and Fig. S1).

166 Three sets of separate transport experiments were conducted using vertical columns under  
167 saturated steady-state flow conditions. The first set aimed to evaluate the appropriateness of use  
168 of SSSNP as non-diffusible particle tracer and the effect of iron oxide on the transport of tracers  
169 and nanoparticles. The experiments included two columns that were wet-packed with uncoated  
170 and goethite-coated sands, respectively. The sand columns were flushed with KCl solution (0.67  
171 mM, pH 6.5) prior to the tracer experiments. The input solution for the sand columns contained  
172 Br<sup>-</sup> (50 mg L<sup>-1</sup> KBr), DFBA (40 mg/L), and SSSNP (40 ug L<sup>-1</sup>) in the KCl solution.

173 The second set of experiments aimed to evaluate the effect of Fe(III)-bioreduction on the  
174 transport of tracers using five columns dry-packed with *Geobacter*-inoculated soil  
175 macroaggregates under anoxic conditions. The experiments included three acetate-stimulated  
176 Fe(III)-bioreduction columns (one with 20 days of continuous injection of acetate and two  
177 replicates with 60 days of acetate injection) and two control columns (no acetate addition). The  
178 60-day experiments aimed to corroborate the results of bioreduction effects observed from the  
179 20-day experiments. After dry packing, the soil aggregate columns were flushed with carbon  
180 dioxide to replace the air in soil pores, followed by flushing with KCl solution (0.67 mM, pH  
181 6.5) to achieve fully saturated conditions without remaining gas pockets. Each column  
182 experiment consisted of three phases with constant level of total ionic strength of solutions (2  
183 mM). Before bioreduction, transport experiments with the KCl input solution containing Br<sup>-</sup> (85  
184 mg/L KBr), DFBA (50 mg/L), and SSSNP (40 µg/L) were performed in all columns (phase 1).  
185 In bioreduction process (phase 2), the columns were flushed with artificial groundwater solution  
186 (AGW), which had a total ionic strength of 2 mM and a pH value of 7.5, consisting of CaCl<sub>2</sub>  
187 (0.075 mM), MgCl<sub>2</sub> (0.082 mM), KCl (0.051 mM), and NaHCO<sub>3</sub> (1.5 mM), modified from  
188 Ferris et al. (2004). The AGW contained trace elements, vitamins, and acetate (bioreduction-

189 stimulated column) or without acetate (control column) (Wolin et al., 1963). Acetate added to the  
190 columns served as the electron donor for *Geobacter*. Effluent samples from columns during  
191 bioreduction were analyzed for the concentrations of Fe(II), Fe(III) and colloids as described in  
192 Section 2.5. After 20 or 60 days of bioreduction, the same transport experiment as that prior to  
193 bioreduction was performed (phase 3). Breakthrough and elution data for Br<sup>-</sup>, DFBA, and  
194 SSSNP were collected during phases 1 and 3. At the conclusion of the above procedures, the  
195 columns were sectioned in 5-cm intervals along the longitudinal flow path of the columns. The  
196 distribution of *Geobacter* and readily deducible iron content in soil aggregates from each section  
197 were investigated as described in Section 2.7 and 2.8.

198 The third set of experiments was conducted to examine the effects of aggregate size  
199 fractions on the transport of tracers and nanoparticles outside the anoxic chamber without  
200 bioreduction treatment (exposed to oxygen), since exposure to aerobic conditions can suppress  
201 reduction of iron oxides. The experiments included two columns, which were dry packed with  
202 microaggregates and macroaggregates, respectively. The experimental procedures were the same  
203 as those used in the second set of column experiments.

## 204 *2.5 Chemical analysis*

205 Bromide concentrations in the effluent fractions were determined using ion chromatography  
206 as described elsewhere (Qin et al., 2017). The concentration of DFBA was measured with a  
207 modified HPLC method (Galdiga and Greibrokk, 1998). Briefly, DFBA was resolved from other  
208 effluent constituents using an Econosphere C-18 RP column (5 µm, 150 mm x 4.6 mm) with  
209 isocratic elution using a mobile phase consisting of 95% K-phosphate buffer (5 mM, pH 3) and  
210 5% acetonitrile (v/v) at a flow rate of 1.0 mL min<sup>-1</sup>. DFBA was quantified using UV absorption

211 at 200 nm and the concentration was calculated via linear regression of peak area of external  
212 DFBA standard solutions over a concentration range from 1 to 50 mg L<sup>-1</sup>. All samples were  
213 diluted 1:10 (v/v) in mobile phase to minimize sample matrix effects and filtered through 0.1 µm  
214 membrane filters (Merck Millipore Ltd., Cork, Ireland) prior to analysis. SSSNP (with  
215 hydrodynamic diameter of 129.8 nm) in effluent fractions were quantified by measuring the  
216 concentration of silver by graphite furnace atomic absorption spectrometry using a Perkin-Elmer  
217 Graphite Furnace AA equipped with a transversely heated graphite atomizer as described by  
218 Fernández et al. (2010). Effluent samples were diluted 10<sup>4</sup> times with deionized water before  
219 analysis, and 20 µL of diluted sample was injected with 10 µL of matrix modifier (prepared by  
220 dissolving 0.05 mg de Pd and 0.003 mg Mg(NO<sub>3</sub>)<sub>2</sub> in 10 µL 1% HNO<sub>3</sub>). The silver detection  
221 program in furnace AA was described in Fernández et al. (2010).

## 222 *2.6 Numerical modeling*

223 The HYDRUS code (Šimůnek et al., 2008) simulating saturated water flow based on the  
224 Richards equation was used to simulate the transport of bromide, DFBA, and SSSNP. Transport  
225 behaviors of Br<sup>-</sup> and 2,6-DFBA were simulated using the classical advection-dispersion equation  
226 (ADE). The transport and retention of SSSNP were simulated using the ADE with first-order  
227 terms for kinetic retention and release as described in the HYDRUS code. The equation is given  
228 in modeling the transport behavior as:

$$229 \frac{\partial(\theta C)}{\partial t} + \rho K_d \frac{\partial C}{\partial t} = \frac{\partial}{\partial z} \left( \theta D \frac{\partial C}{\partial z} \right) - \frac{\partial q C}{\partial z} - \theta \mu C$$

230 where  $\theta$  [L<sup>3</sup>L<sup>-3</sup>] is the pore volume in the column, C [M L<sup>-3</sup>; M represents the units of mass] is  
231 the concentration of bromide, DFBA, and SSSNP in the aqueous phase,  $\rho$  [M L<sup>-3</sup>] is the bulk  
232 density of soil aggregates,  $K_d$  [L<sup>3</sup> M<sup>-1</sup>] is the adsorption coefficient to soil aggregates, t is time

233 [T, T represents time units],  $D [L^2 T^{-1}]$  is the hydrodynamic dispersion coefficient,  $z [L]$  is the  
234 distance from the inlet of a column,  $q [L T^{-1}]$  is the Darcy velocity of input solutions, and  $\mu [T^{-1}]$   
235 is the first-order retention coefficient for tracer transformation processes.

### 236 *2.7 Assessment of soil aggregate properties*

237 Component analysis of soil aggregates were performed by commercial service of Midwest  
238 Laboratories Inc. (Omaha, NE, USA). Particle size distribution of soil aggregates was analyzed  
239 to indicate the reactivity behaviors of soil aggregates. The procedures and principles were  
240 described in Kemper and Rosenau (1986). Fifty grams of air-dried soil aggregates were  
241 presoaked in distilled water for 30 min and sieved with a top-down sequence of seven sieves of  
242 2,000, 840, 300, 250, 150, 90, and 53 mm mesh size. The sieves with the contents were  
243 oscillated vertically in water with an amplitude of 4 cm at a rate of one oscillation per second for  
244 twenty times. The retained aggregates on each sieve after wet-sieving were recovered and dried  
245 at 50 °C in a drying oven. The particle size distribution was calculated with dry weight fractions.  
246 After bioreduction, dispersion of the aggregates was assessed based on readily reducible iron  
247 content. Soil aggregates from each section were homogenized, and 5-g sub-samples were placed  
248 in 50-mL centrifuge tubes, in which soil aggregates were shaken vigorously with 40-mL distilled  
249 water in an ice-water bath for 30 min (Kemper and Rosenau, 1986; Viollier et al., 2000). The  
250 mixtures were centrifuged at 4,248 g for 20 min, and the readily reducible iron in supernatant  
251 were determined using a modified Ferrozine method (Stookey, 1970). During column  
252 bioreduction experiments, the concentrations of Fe(II) and Fe(III) in the effluent were measured  
253 using a modified Ferrozine method (Stookey, 1970). Colloids were determined by centrifuging  
254 the effluent sample at 4,248 g for 20 min and measuring the mass of pellets after oven-drying,  
255 assuming the mass of dissolved salts was negligible.

## 256 2.8 DNA extraction and sequencing

257 To analyze the distribution of *Geobacter* in soil aggregates, DNA was extracted from  
258 fractioned soil aggregates using PowerLyser PowerSoil DNA isolation kit (MoBio Laboratories  
259 Inv. Carlsbad, California, USA). The DNA samples were quantified using PicoGreen Assay Kit  
260 (Carlsbad, CA, USA) and sent out for sequencing at HudsonAlpha Genomics Services Lab  
261 (Huntsville, AL, USA). The V3-V4 region of 16S rRNA gene of bacteria were amplified with  
262 primers of 341F\_CCTACG GNGGCWGCAG and 785R\_GACTACHVGGGTATCTAATCC)  
263 in PCR. Finally, sequencing was performed using 300PE (paired-end) on the Illumina MiSeq  
264 platform (Illumina, USA). All methods were performed according to the manufacturers'  
265 protocol. Sequences analyses were performed using MOTHUR per standard operating procedure  
266 (Kozich et al., 2013). The results of these sequence analyses were used to calculate the relative  
267 abundance of *Geobacter* along the flow path in the columns.

## 268 3 Results and discussion

### 269 3.1 Effect of iron oxide on transport

270 The uncoated and goethite-coated quartz sands were used as simple and stable porous  
271 systems to evaluate the effect of iron oxide on the transport of tracers and nanoparticles. Br<sup>-</sup> was  
272 included in the input solution to quantify transport behaviors of a diffusible tracer and to evaluate  
273 uniformity and integrity of the column packing in terms of hydrodynamic dispersion. As a  
274 conservative tracer, Br<sup>-</sup> showed ideal and complete transport behavior in the sand with and  
275 without goethite coating (Fig. 1). In comparison, the breakthrough of SSSNP from the uncoated  
276 sand was slightly retarded relative to that of Br<sup>-</sup> and eventually reached a stable maximum  
277 relative concentration (max C/C<sub>0</sub>) of 0.85. However, almost no SSSNP broke through the

278 goethite-coated sand column. The fitted parameters of the breakthrough curves of SSSNP  
279 showed a 14-fold increase in attachment and a 3-fold decrease in detachment of SSSNP in  
280 goethite-coated sand compared with the uncoated sand columns. The maximum solid phase  
281 concentration of SSSNP was ~20 times higher in the goethite-coated sand than in the uncoated  
282 sand, suggesting a strong affinity of the SSSNP to the iron-oxide surface (Table 1). The strong  
283 attachment of SSSNP to goethite-coated sand in this study was consistent with previous results  
284 showing sequestration of silver nanoparticle (no silica-shell) by iron oxides (Sagee et al., 2012;  
285 Liang et al., 2013).

### 286 *3.2 Effect of aggregates on transport*

287 To further determine if the change in soil aggregate sizes primarily influences the transport of  
288 DFBA and SSSNP in column experiments, transport experiments were conducted in columns  
289 packed with water-stable macroaggregates (250-2,000  $\mu\text{m}$ ) and microaggregates (53-250  $\mu\text{m}$ )  
290 under oxic conditions and without any reduction of Fe(III) oxides. The transport of bromide  
291 through both aggregate fractions showed no obvious differences (Fig. 2); however, DFBA was  
292 retarded in both columns, with larger retardation in the microaggregates ( $K_d$  of 0.12) than in the  
293 macroaggregates ( $K_d$  of 0.06). Since the surface properties of macroaggregates and  
294 microaggregates should have been very similar, the larger retardation is ascribed to the greater  
295 total surface area and smaller pores of the microaggregates compared to the macroaggregates.  
296 The breakthrough of SSSNP was negligible with both columns likely due to the strong  
297 interactions of SSSNP with Fe(III) oxides (Fig. 2). Similar results of decreased silver  
298 nanoparticle mobility in smaller soil aggregates were reported by Sagee et al. (2012), in which  
299 the explanation was proposed that the reaction of silver nanoparticles with soil occurs at the  
300 aggregate surface, and the smaller aggregates have increased surface area. Aggregate structure

301 has been shown to play an important role in retention of large molecules and nanoparticles with  
302 complicated interacting environmental factors (Sagee et al., 2012; Liang et al., 2013). For  
303 example, transport of silver nanoparticles in natural soil showed that aggregate size exerted  
304 major influence on silver nanoparticle transport, with silver nanoparticle mobility increased in  
305 the column of larger soil aggregates (Sagee et al., 2012). The transport and retention of silver  
306 nanoparticles in sand columns by Liang et al. (2013) also found that the mobility of silver  
307 nanoparticles was enhanced by increase in sand grain size. The soil aggregates used in this study  
308 were highly rich in iron oxides and had strong binding capacity for SSSNP, which caused  
309 complete retention of SSSNP in both microaggregates and macroaggregates columns. In  
310 contrast, the retardation of DFBA increased in the microaggregates.

### 311 *3.3 Effect of short time bioreduction on transport*

312 Soil aggregates rich in iron oxides were used to examine the effect of Fe(III)-bioreduction on  
313 transport behaviors of tracers and nanoparticles. The breakthrough of Br<sup>-</sup> occurred at  
314 approximately one pore volume before and after the Fe(III)-bioreduction phase (Fig. 3),  
315 indicating that Fe(III)-bioreduction did not influence the transport of the conservative tracer.  
316 Transport of DFBA exhibited some retardation and tailing in the breakthrough experiment before  
317 the bioreduction, but the retardation was eliminated after the bioreduction phase (Figs. 3 and 4).  
318 This result suggests that Fe(III)-bioreduction induced either physical and/or chemical changes of  
319 the aggregates. Modeling results showed that the estimated dispersivity ( $D$ ) of DFBA during  
320 transport remained similar before and after the Fe(III)-bioreduction phase while the estimated  
321 DFBA sorption coefficient ( $K_d$ ) was about one order of magnitude lower after Fe(III)-  
322 bioreduction (Table 2). SSSNP exhibited a very pronounced response to the Fe(III)-bioreduction  
323 treatment. Almost no breakthrough of SSSNP was observed before Fe(III)-bioreduction (i.e., in



324 phase 1), whereas the relative concentrations ( $C/C_0$ ) of SSSNP in the effluent reached only 0.3  
325 after the Fe(III)-bioreduction (i.e., in phase 3) (Fig. 3). The estimated maximum solid phase  
326 concentration of SSSNP in phase 3 was one fourth that in phase 1 with a lower attachment  
327 coefficient. The estimated detachment coefficient of SSSNP was 100-fold greater in phase 3 than  
328 in phase 1 (Table 2). These results indicate that the presence of Fe(III) oxides greatly reduced the  
329 mobility of the nanoparticle tracer. Ryan et al. (1999) found that the bacteriophage particles and  
330 silica colloids attached to iron oxide-coated sand could be mobilized by anionic surfactant,  
331 elevated pH, and reductant, suggesting that iron oxide removal could promote the detachment of  
332 colloids and bacteriophage. Vink et al. (2017) showed that arsenic release corresponded to the  
333 fractions of readily reducible iron in sediments. At the initial phase of incubation with acetate-  
334 supplemented AGW solution, microbially mediated bioreduction released relatively small  
335 amount of Fe(II) from soil aggregates, causing certain alteration of the aggregate surface  
336 properties. Since the binding capacity for metals and colloids are highly dependent on ferric  
337 phases in soils (Pedersen et al., 2006), the reduction of iron oxides can lead to release of certain  
338 amount of retained molecules and colloids, such as DFBA and SSSNP.

339 The detection of soluble Fe(II) in the effluent indicated reduction of soil Fe(III) by  
340 *Geobacter* and/or other Fe(III)-reducing bacteria (Fig. 4). The increase in effluent Fe(II)  
341 concentrations in the first two weeks corresponded to the increase in microbial activity as acetate  
342 was added to the feed solution (Fig. 4). The effluent Fe(II) concentrations plateaued after 20 days  
343 of acetate injection, suggesting retardation of Fe(III) bioreduction (Fig. 5). The accumulated  
344 amount of Fe(II) in the effluent was approximately 0.125 mmol or about 0.04% of the total iron  
345 in the column. No Fe(III) oxides or other colloids were detected in the effluent during the 20-day  
346 bioreduction treatment. Although only a very small fraction of total Fe(III) was reduced to

347 soluble Fe(II) (assuming there were no secondary precipitation of Fe(II) in the column), the  
348 influences of Fe(III) reduction on the transport of DFBA and SSSNP were significant. This  
349 effect is attributable to Fe(II) binding to Fe(III) solids and/or the reduction of the most  
350 bioavailable Fe(III) on the external surfaces of the aggregates and/or along the advective  
351 pathways that are most accessible by less diffusible microorganisms and particle tracers (e.g.,  
352 SSSNP). Removal of surface iron oxides during bioreduction could reduce positive electric  
353 charges and roughness on mineral surfaces (Joe-Wong et al., 2017), causing a decrease in surface  
354 deposition of nanoparticles.

355 An in-situ study investigating the mobility of arsenate in natural groundwater showed that  
356 arsenic desorption occurred with reductive dissolution of ferric oxides in ferrihydrite, goethite,  
357 and hematite (Zhang et al., 2017). Microbial metabolism can affect the affinity of nanoparticles,  
358 and therefore cause the simultaneous releases of Fe and Fe(III)- oxide-bound particles. Similarly,  
359 Moon et al. (2017) reported that the genus *Geobacter*, *Anaeromyxobacter*, and  
360 *Desulfosporosinus* might play important roles in release of arsenic coupled with iron reduction.  
361 In this study, the concentration of Fe(II) in the effluent increased with time during the 20-day  
362 treatment demonstrating bioreduction of iron oxides in the acetate-treated soil column. However,  
363 without Fe(III) oxides or other colloids detected in the effluent, no evidence of structural  
364 breakdown in soil aggregates was observed during the whole bioreduction process. The  
365 enhanced transport of SSSNP was most likely attributed to the microbial reduction-induced  
366 transformation of iron minerals, resulting in less contact of SSSNP with iron oxides. A very  
367 recent study by Xiao et al. (2018) reported that the transformation from less crystalline to more  
368 crystalline iron oxides by iron reducing bacterium *Shewanella oneidensis* MR-1 affected the

369 behavior of any species absorbed to the iron oxides, suggesting that the produced Fe(II) can  
370 stimulate the reduction and transformation of iron oxide minerals.

### 371 *3.4 Effect of long time bioreduction on transport*

372 Given only 0.04% of the total iron was detected in the effluent in the 20-day bioreduction  
373 experiment, additional aggregate-packed column experiments with the duration of acetate-  
374 stimulated Fe(III)-bioreduction extended to 60 days were conducted to further examine the effect  
375 of bioreduction on Fe(II) release, aggregate breakdown, and tracer transport. The transport  
376 behaviors of bromide and DFBA showed no change after the 60-day Fe(III)-bioreduction  
377 treatment, whereas SSSNP were completely retained in the soil aggregates both before and after  
378 the 60-day acetate injection (Fig. 6 and Table 2). These results are inconsistent with the  
379 observations made in the short time experiment with 20-day acetate injection, where Fe(III)-  
380 bioreduction resulted in earlier breakthrough of DFBA and SSSNP. The longer duration of  
381 Fe(III)-bioreduction (60 d) brought about as yet unknown changes to the properties of soil  
382 aggregates and resulted in complete retention of the SSSNP particles, though retardation and  
383 slow release of the DFBA were not observed in the short time experiment.

384 The release of soluble Fe(II) in the 60-day experiment was similar to the 20-day experiments  
385 during the first 20 days but exhibited a steady increase in the effluent Fe(II) concentration  
386 through day 60 (Fig. 7). The concentration of soluble Fe(II) reached 300  $\mu\text{M}$ , or more than 10  
387 times the total amount observed at the end of the 20-day Fe(III) bioreduction experiment. The  
388 accumulated amount of soluble Fe(II) collected in the effluent was 1.43 mmol or about 0.48% of  
389 the total Fe in the soil aggregates within the column. Colloids were first detected in the effluent  
390 at 30 days after the acetate injection and continued to increase in concentration during the 60-day

391 Fe(III)-bioreduction treatment, further suggesting that Fe(III)-bioreduction and aggregate  
392 breakdown were active throughout the biostimulation phase of the soil column experiment (Fig.  
393 7). A small amount of Fe(II) was also detected in the effluent of the control column, indicating  
394 that *Geobacter* was able to couple oxidation of the native soil organic carbon with Fe(III)  
395 reduction. The inconsistent tracer transport results between the 20-day and 60-day bioreduction  
396 experiments very likely arose from the greater aggregate breakdown that occurred during the  
397 extended period (day 20-60) than the initial period (day 0-20) of the bioreduction treatment. The  
398 aggregate breakdown generated soil colloids, which may have increased mechanical straining of  
399 SSSNP in soil pores and may have exposed aggregate interior Fe(III)-oxide surfaces promoting  
400 the attachment of SSSNP on positively charged surfaces.

### 401 *3.5 Effect of long time bioreduction on aggregate structure*

402 The above results suggested that the soil aggregates experienced structural breakdown during  
403 the 60-day Fe(III)-bioreduction phase with acetate injection. To get direct evidence, we  
404 characterized the size distribution of water-stable soil aggregates in each column. The acetate-  
405 treated columns contained significantly more soil aggregates with size less than 90  $\mu\text{m}$  than the  
406 control column (i.e., no acetate injection) ( $P < 0.05$ , Fig. 8). The aggregate fractions with sizes  
407 of 150-2,000  $\mu\text{m}$  in acetate-treated columns were similar to those in the control column. It is  
408 obvious that the soil aggregates enduring 60-day bioreduction generated more microaggregates  
409 compared to the soil aggregates with 20-day bioreduction.

410 Our results also show that the bioreduction increased releases of iron and soil colloids. The  
411 divergence of soil aggregates along the length of the columns was also examined by measuring  
412 residual water-extractable total Fe. The readily reducible iron contained in the soil aggregates  
413 was much higher in the influent sections of the 60-day acetate-fed columns (A and B) with a

414 range of 20-25 mg g<sup>-1</sup> compared to the control (Fig. 9). The readily reducible iron in the effluent  
415 sections of the acetate-fed columns was less than 5 mg g<sup>-1</sup>. In the control column, the water-  
416 extractable iron content ranged between 4.5 and 5.5 mg g<sup>-1</sup> in the influent sections to less than 1  
417 mg g<sup>-1</sup> in the effluent section. The amounts of readily reducible iron in the acetate-amended  
418 columns exceeded that of the control column by approximately five fold. These trends were very  
419 consistent with the distribution of the relative abundance of *Geobacter* in the columns (Fig. 9),  
420 suggesting that Fe(III)-bioreduction by *Geobacter* contributed to the releases of iron and  
421 colloids. These results indicate more significant structural breakdown of the soil aggregates in  
422 the soil depths receiving more electron donors.

#### 423 **4. Conclusions and implications**

424 Acetate injection stimulated microbially mediated Fe(III)-oxide reduction, and when  
425 delivered for a relatively short duration (i.e. 20 d) it enhanced the transport of an organic  
426 molecular tracer (DFBA) and nanoparticle tracers (silica-shelled silver nanoparticles) compared  
427 with the transport exhibited prior to acetate injection. However, in the subsequent experiment,  
428 when the acetate injection period was extended to 60 d the impact on transport disappeared and  
429 the transport of all tracers was identical in acetate treated and control columns despite significant  
430 aggregate structural breakdown in the acetate treated columns. The limited data suggest that soil  
431 aggregates had minimal structural breakdown during the first 20-day of bioreduction, and as a  
432 result, only Fe(III)-oxides coating the exterior surfaces of the aggregates were reduced, yielding  
433 advective flow paths with chemically less reactive surfaces that were unfavorable for the  
434 attachment of organic and colloidal tracers on the aggregates. In comparison, more aggregates  
435 were dispersed during the 60-day bioreduction experiment, causing exposure of interior Fe(III)-  
436 oxide surfaces, generating larger reactive surfaces that were favorable for the attachment of

437 organic and colloidal tracers. As a result, the initial 20-day effect was canceled by the subsequent  
438 40-day of extended acetate injection, leading to similar breakthrough behaviors to those observed  
439 before the Fe(III)-bioreduction phase. Electron donor addition during biostimulation cannot  
440 continue indefinitely. Thus, upon termination of biostimulation, the treated area will ultimately  
441 return to its original redox status as oxygenated groundwater passes through the treatment zone.  
442 Future studies should address the influence of Fe(II) re-oxidation on tracer transport in relation to  
443 changes in soil properties, such as, pore structure and aggregate surface charges along the flow  
444 path.

#### 445 **Conflict of Interest**

446 The authors declare no conflicts of interest.

#### 447 **Acknowledgments**

448 The authors acknowledge with tremendous respect, the contributions of Dr. Phillip Jardine  
449 (posthumously) and his collaborators (Drs. Colleen Hansel, Jack Parker, Ungtae Kim, and Kirk  
450 Scheckel) for conceiving and executing the research upon which the current work was founded.  
451 This research was financially supported by the Strategic Environmental Research and  
452 Development Program (SERDP) under project ER-2130. We also acknowledge financial support  
453 from the China Scholarship Council to support X.L.

454

455

456

457

## 458 **References**

- 459 Arora, B., Mohanty, B.P., McGuire, J.T., 2015. An integrated Markov chain Monte Carlo  
460 algorithm for upscaling hydrological and geochemical parameters from column to field  
461 scale. *Sci. Total Environ.* 512, 428-443. <https://doi.org/10.1016/j.scitotenv.2015.01.048>.
- 462 Aulenta, F., Majone, M., Tandoi, V., 2006. Enhanced anaerobic bioremediation of chlorinated  
463 solvents: environmental factors influencing microbial activity and their relevance under field  
464 conditions. *J. Chem. Technol. Biotechnol.* 81, 1463-1474. <https://doi.org/10.1002/jctb.1567>.
- 465 Bose, P., Sharma, A., 2002. Role of iron in controlling speciation and mobilization of arsenic in  
466 subsurface environment. *Water Res.* 36, 4916–4926. [https://doi.org/10.1016/S0043-](https://doi.org/10.1016/S0043-1354(02)00203-8)  
467 [1354\(02\)00203-8](https://doi.org/10.1016/S0043-1354(02)00203-8).
- 468 Bradford, S.A., Torkzaban, S., 2008. Colloid transport and retention in unsaturated porous  
469 media: a review of interface-, collector-, and pore-scale processes and models. *Vadose Zone*  
470 *J.* 7, 667-681. <https://doi.org/10.2136/vzj2007.0092>.
- 471 Braunschweig, J., Bosch, J., Meckenstock, R.U., 2013. Iron oxide nanoparticles in  
472 geomicrobiology: from biogeochemistry to bioremediation. *New Biotechnol.* 30, 793-802.  
473 <https://doi.org/10.1016/j.nbt.2013.03.008>.
- 474 Caccavo, F., Lonergan, D.J., Lovley, D.R., Davis, M., Stolz, J.F., McInerney, M.J., 1994.  
475 *Geobacter sulfurreducens* sp. Nov., a hydrogen- and acetate-oxidizing dissimilatory metal-  
476 reducing microorganism. *Appl. Environ. Microbiol.* 60, 3752-3759.
- 477 Caldwell, M.E., Tanner, R.S., Suflita, J.M., 1999. Microbial metabolism of benzene and the  
478 oxidation of ferrous iron under anaerobic conditions: implications for bioremediation.  
479 *Environ. Microbiol.* 5, 595-565. <https://doi.org/10.1006/anae.1999.0193>.

- 480 Chapelle, F.H., Lovley, D.R., 1992. Competitive exclusion of sulfate reduction by Fe(III)-  
481 reducing bacteria: a mechanism for producing discrete zones of high-iron ground water.  
482 *Ground Water* 30, 29-36. <https://doi.org/10.1111/j.1745-6584.1992.tb00808.x>.
- 483 Coates, J.D., Anderson, R.T., 2000. Emerging techniques for anaerobic bioremediation of  
484 contaminated environments. *Trends Biotechnol.* 18, 408-412. [https://doi.org/10.1016/S0167-  
485 7799\(00\)01478-5](https://doi.org/10.1016/S0167-7799(00)01478-5)
- 486 De-Camposa, A.B, Mamedovb, A.I., Huang, C.H., 2009. Short-term reducing conditions  
487 decrease soil aggregation. *Soil Sci. Soc. Am. J.* 73, 550-559.  
488 <https://doi.org/10.2136/sssaj2007.0425>.
- 489 Deng, L., Yuan, P., Liu, D., Annabi-Bergaya, F., Zhou, J., Chen, F., Liu, Z., 2017. Effects of  
490 microstructure of clay minerals, montmorillonite, kaolinite and halloysite, on their benzene  
491 adsorption behaviors. *Appl. Clay Sci.* 143, 184-191.  
492 <https://doi.org/10.1016/j.clay.2017.03.035>.
- 493 Ellis, D.E., Lutz, E.J., Odom, J.M., Buchanan, R.J., Bartlett, C.L., Lee, M.D., Harkness, M.R.,  
494 DeWeerd, K.A., 2000. Bioaugmentation for accelerated in situ anaerobic bioremediation.  
495 *Environ. Sci. Technol.* 34, 2254–2260. <https://doi.org/10.1021/es990638e>.
- 496 Fernández, A., Picouet, P., Lloret, E., 2010. Cellulose-silver nanoparticle hybrid materials to  
497 control spoilage-related microflora in absorbent pads located in trays of fresh-cut melon. *Int.*  
498 *J. Food Microbiol.* 142, 222-228. <https://doi.org/10.1016/j.ijfoodmicro.2010.07.001>.
- 499 Ferris, F.G., Phoenix, V., Fujita, Y., Smith, R.W., 2004. Kinetics of calcite precipitation induced  
500 by ureolytic bacteria at 10 to 20 C in artificial groundwater. *Geochim. Cosmochim. Acta* 68,  
501 1701-1710. [https://doi.org/10.1016/S0016-7037\(03\)00503-9](https://doi.org/10.1016/S0016-7037(03)00503-9).



- 502 Galdiga, C.U., Greibrokk, T., 1998. Trace analysis of fluorinated aromatic carboxylic acids in  
503 aqueous reservoir fluids by HPLC. *J. Liq. Chromatogr. Relat. Technol.* 21, 855-868.  
504 <https://doi.org/10.1080/10826079808000514>.
- 505 Goldberg, S., Kapoor, B.S., Rhoades, J.D., 1990. Effect of aluminum and iron oxides and  
506 organic matter on flocculation and dispersion of arid zone soils. *Soil Sci.* 150, 588-593.
- 507 Guan, Z., Tang, X.Y., Nishimura, T., Katou, H., Liu, H.Y., Qing, J., 2017. Surfactant-enhanced  
508 flushing enhances colloid transport and alters macroporosity in diesel-contaminated soil. *J.*  
509 *Environ. Sci.* <http://dx.doi.org/10.1016/j.jes.2017.06.006>.
- 510 Hansel, C.M., Benner, S.G., Neiss, J., Dohnalkova, A., Kukkadapu, R.K, Fendorf, S., 2003.  
511 Secondary mineralization pathways induced by dissimilatory iron reduction of ferrihydrite  
512 under advective flow. *Geochim. Cosmochim. Acta* 67, 2977–2992.  
513 [http://dx.doi.org/10.1016/S0016-7037\(03\)00276-X](http://dx.doi.org/10.1016/S0016-7037(03)00276-X).
- 514 Hansel, C.M., Benner, S.G., Fendorf, S., 2005. Competing Fe(II)-induced mineralization  
515 pathways of ferrihydrite. *Environ. Sci. Technol.* 39, 7147-7153.  
516 <http://dx.doi.org/10.1021/es050666z>.
- 517 Joe-Wong, C., Brown Jr, G.E., Maher, K., 2017. Kinetics and Products of Chromium (VI)  
518 Reduction by Iron (II/III)-Bearing Clay Minerals. *Environ. Sci. Technol.* 51, 9817-9825.  
519 <https://doi.org/10.1021/acs.est.7b02934>.
- 520 Karadimitriou, N.K., Joekar-Niasar, V., Brizuela, O.G., 2017. Hydro-dynamic Solute Transport  
521 under Two-Phase Flow Conditions. *Sci. Rep.* 7, 6624. [http://dx.doi.org/10.1038/s41598-](http://dx.doi.org/10.1038/s41598-017-06748-1)  
522 [017-06748-1](http://dx.doi.org/10.1038/s41598-017-06748-1).

- 523 Kemper W.D., Rosenau R.C., 1986. Aggregate stability and size distribution. In: Klute A, ed.  
524 Methods of soil analysis, Part 2 chemical and mineralogical methods (2nd edition).  
525 Madison: Soil Science Society of America. Fitchburg, WI, pp. 491-515
- 526 Kozich, J.J., Westcott, S.L., Baxter, N.T., Highlander, S.K., Schloss, P.D., 2013. Development of  
527 a dual-index sequencing strategy and curation pipeline for analyzing amplicon sequence data  
528 on the MiSeq Illumina sequencing platform. *Appl. Environ. Microbiol.* 79, 5112-5120.  
529 <http://dx.doi.org/10.1128/AEM.01043-13>.
- 530 Jardine, P.M., 2008. Influence of coupled processes on contaminant fate and transport in  
531 subsurface environments. *Adv. Agron.* 99, 1-99. [https://doi.org/10.1016/S0065-](https://doi.org/10.1016/S0065-2113(08)00401-X)  
532 [2113\(08\)00401-X](https://doi.org/10.1016/S0065-2113(08)00401-X).
- 533 Liang, X., Shi, R., Radosevich, M., Zhao, F., Zhang, Y., Han, S., Zhang, Y., 2017. Anaerobic  
534 lipopeptide biosurfactant production by an engineered bacterial strain for in situ microbial  
535 enhanced oil recovery. *RSC Adv.* 7, 20667-20676. <https://doi.org/10.1039/C7RA02453C>.
- 536 Liang, Y., Bradford, S.A., Simunek, J., Vereecken, H., Klumpp, E., 2013. Sensitivity of the  
537 transport and retention of stabilized silver nanoparticles to physicochemical factors. *Water*  
538 *Res.* 47, 2572-2582. <https://doi.org/10.1016/j.watres.2013.02.025>.
- 539 Löffler, F.E., Sanford, R.A., Tiedje, J.M., 1996. Initial Characterization of a Reductive  
540 Dehalogenase from *Desulfitobacterium chlororespirans* Co23. *Appl. Environ. Microbiol.* 62,  
541 3809-3813.
- 542 Lovley, D.R., 2003. Cleaning up with genomics: applying molecular biology to bioremediation.  
543 *Nat. Rev. Microbiol.* 1, 35-44. <https://doi.org/10.1038/nrmicro731>.

- 544 Maurice, P.A., Hochella, M.F., 2008. Nanoscale particles and processes: a new dimension in soil  
545 science. *Adv. Agron.* 100, 123-153. [https://doi.org/10.1016/S0065-2113\(08\)00605-6](https://doi.org/10.1016/S0065-2113(08)00605-6).
- 546 Mayes, M.A., Jardine, P.M., Mehlhorn, T.L., Bjornstad, B.N., Ladd, J.L., Zachara, J.M., 2003.  
547 Hydrologic processes controlling the transport of contaminants in humid region structured  
548 soils and semi-arid laminated sediments. *J. Hydrol.* 275, 141-161.  
549 [https://doi.org/10.1016/S0022-1694\(03\)00039-8](https://doi.org/10.1016/S0022-1694(03)00039-8).
- 550 McCarthy, J.F., McKay, L.D., 2004. Colloid transport in the subsurface: past, present and future  
551 challenges. *Vadose Zone J.* 3, 326-337. <https://doi.org/10.2136/vzj2004.0326>.
- 552 McKay, L.D., Sanford, W.E., Strong, J.M., 2000. Field-scale migration of colloidal tracers in a  
553 fractured shale saprolite. *Ground Water* 38, 139-147. [https://doi.org/10.1111/j.1745-  
554 6584.2000.tb00211.x](https://doi.org/10.1111/j.1745-6584.2000.tb00211.x).
- 555 Mehra, O.P., Jackson, M.L., 1960. Iron oxide removal from soils and clays by dithionite-citrate  
556 system buffered with sodium bicarbonate. *Clay. Clay Miner.* 7, 317-327.  
557 <https://doi.org/10.1016/B978-0-08-009235-5.50026-7>.
- 558 Mejia, J., Roden, E.E., Ginder-Vogel, M., 2016. Influence of oxygen and nitrate on Fe (hydr)  
559 oxide mineral transformation and soil microbial communities during redox cycling. *Environ.*  
560 *Sci. Technol.* 50, 3580-3588. <https://doi.org/10.1021/acs.est.5b05519>.
- 561 Mohanty, S.K., Saiers, J.E., Ryan, J.N., 2016. Colloid mobilization in a fractured soil: effect of  
562 pore-water exchange between preferential flow paths and soil matrix. *Environ. Sci. Technol.*  
563 50, 2310-2317. <https://doi.org/10.1021/acs.est.5b04767>.

- 564 Moon, H.S., Kim, B.A., Hyun, S.P., Lee, Y.H., Shin, D., 2017. Effect of the redox dynamics on  
565 microbial-mediated As transformation coupled with Fe and S in flow-through sediment  
566 columns. *J. Hazard. Mater.* 329, 280-289. <https://doi.org/10.1016/j.jhazmat.2017.01.034>.
- 567 Pachapur, V.L., Larios, A.D., Cledon, M., Brar, S.K., Verma, M., Surampalli, R.Y., 2016.  
568 Behavior and characterization of titanium dioxide and silver nanoparticles in soils. *Sci. Total*  
569 *Environ.* 563, 933-943. <https://doi.org/10.1016/j.scitotenv.2015.11.090>.
- 570 Pedersen, H.D., Postma, D., Jakobsen, R., 2006. Release of arsenic associated with the reduction  
571 and transformation of iron oxides. *Geochim. Cosmochim. Acta* 70, 4116–4129.  
572 <https://doi.org/10.1016/j.gca.2006.06.1370>.
- 573 Qin, Q., Chen, X.J., Zhuang, J., 2017. The surface-pore integrated effect of soil organic matter  
574 on retention and transport of pharmaceuticals and personal care products in soils. *Sci. Total*  
575 *Environ.* 599, 42-49. <https://doi.org/10.1016/j.scitotenv.2017.04.148>.
- 576 Ryan, J.N., Elimelech, M., Ard, R.A., Harvey, R.W., Johnson, P.R., 1999. Bacteriophage PRD1  
577 and silica colloid transport and recovery in an iron oxide-coated sand aquifer. *Environ. Sci.*  
578 *Technol.* 33, 63-73. <https://doi.org/10.1021/es980350>.
- 579 Sagee, O., Dror, I., Berkowitz, B., 2012. Transport of silver nanoparticles (AgNPs) in soil.  
580 *Chemosphere* 88, 670-675. <https://doi.org/10.1016/j.chemosphere.2012.03.055>.
- 581 Schaidler, L.A., Senn, D.B., Estes, E.R., Brabander, D.J., Shine, J.P., 2014. Sources and fates of  
582 heavy metals in a mining-impacted stream: temporal variability and the role of iron oxides.  
583 *Sci. Total Environ.* 490, 456-466. <https://doi.org/10.1016/j.scitotenv.2014.04.126>.

- 584 Si, Y., Zou, Y., Liu, X., Si, X., Mao, J., 2015. Mercury methylation coupled to iron reduction by  
585 dissimilatory iron-reducing bacteria. *Chemosphere* 122, 206-212.  
586 <https://doi.org/10.1016/j.chemosphere.2014.11.054>.
- 587 Šimůnek, J., van Genuchten, M.T. and Šejna, M., 2008. Development and applications of the  
588 HYDRUS and STANMOD software packages and related codes. *Vadose Zone J.* 7,  
589 <https://doi.org/587-600.10.2136/vzj2007.0077>.
- 590 Song, B., Zeng, G., Gong, J., Liang, J., Xu, P., Liu, Z., Zhang, Y., Zhang, C., Cheng, M., Liu, Y.,  
591 Ye, S., 2017. Evaluation methods for assessing effectiveness of in situ remediation of soil  
592 and sediment contaminated with organic pollutants and heavy metals. *Environ. Int.* 105, 43-  
593 55. <https://doi.org/10.1016/j.envint.2017.05.001>.
- 594 Stookey, L.L., 1970. Ferrozine—a new spectrophotometric reagent for iron. *Anal. Chem.* 42,  
595 779-781. <https://doi.org/10.1021/ac60289a016>.
- 596 Thompson, A., Chadwick, O.A., Boman, S., Chorover, J., 2006. Colloid mobilization during soil  
597 iron redox oscillations. *Environ. Sci. Technol.* 40, 5743–5749.  
598 <https://doi.org/10.1021/es061203b>.
- 599 Vink, J.P., van Zomeren, A., Dijkstra, J.J., Comans, R.N., 2017. When soils become sediments:  
600 Large-scale storage of soils in sandpits and lakes and the impact of reduction kinetics on  
601 heavy metals and arsenic release to groundwater. *Environ. Pollut.* 227, 146-156.  
602 <https://doi.org/10.1016/j.envpol.2017.04.016>.
- 603 Viollier, E., Inglett, P.W., Hunter, K., Roychoudhury, A.N., van Cappellen, P., 2000. The  
604 ferrozine method revisited: Fe(II)/Fe(III) determination in natural waters. *Appl. Geochem.*  
605 15, 785-790. [https://doi.org/10.1016/S0883-2927\(99\)00097-9](https://doi.org/10.1016/S0883-2927(99)00097-9).

- 606 Weber, K.A., Achenbach, L.A., Coates, J.D., 2006. Microorganisms pumping iron: anaerobic  
607 microbial iron oxidation and reduction. *Nat. Rev. Microbiol.* 4, 752-764.  
608 <https://doi.org/10.1038/nrmicro1490>.
- 609 Wolin, F.A., Wolin, M.J., Wolfe, R.S., 1963. Formation of methane by bacterial extracts. *J. Biol.*  
610 *Chem.* 238, 2882-2886.
- 611 Xiao, W., Jones, A.M., Li, X., Collins, R.N., Waite, T.D., 2018. Effect of *Shewanella oneidensis*  
612 on the kinetics of Fe (II)-catalyzed transformation of ferrihydrite to crystalline iron oxides.  
613 *Environ. Sci. Technol.* 52, 114-123. <https://doi.org/10.1021/acs.est.7b05098>.
- 614 Zhang, D., Guo, H., Xiu, W., Ni, P., Zheng, H., Wei, C., 2017. In-situ mobilization and  
615 transformation of iron oxides-adsorbed arsenate in natural groundwater. *J. Hazard. Mater.*  
616 321, 228-237. <https://doi.org/10.1016/j.jhazmat.2016.09.021>.
- 617 Zhuang, J., Jin, Y., Flury, M., 2003. Colloid-facilitated cesium transport through water-saturated  
618 Hanford sediment and Ottawa sand. *Environ. Sci. Technol.* 37, 4905-4911.  
619 <https://doi.org/10.1021/es0264504>.
- 620 Zhuang, J., Qi, J., Jin, Y., 2005. Retention and transport of amphiphilic colloids under  
621 unsaturated flow conditions: effect of particle size and surface properties. *Environ. Sci.*  
622 *Technol.* 39, 7853-7859. <https://doi.org/10.1021/es050265j>.
- 623 Zhuang, J., McCarthy, J.F., Perfect E., Tyner, J., Flury, M., 2007. In-situ colloid mobilization in  
624 Hanford sediments under unsaturated transient flow condition: Effect of irrigation pattern.  
625 *Environ. Sci. Technol.* 41, 3199-3204. <https://doi.org/10.1021/es062757h>.

- 626 Zhuang, J., Jin, Y., 2008. Interactions between virus and goethite during saturated flow: effects  
627 of solution pH, carbonate, and phosphate. *J. Contam. Hydrol.* 98, 15-21.  
628 <https://doi.org/10.1016/j.jconhyd.2008.02.002>.
- 629 Zhuang, J., Tyner, J.S., Perfect, E., 2009. Colloid transport and remobilization in unsaturated  
630 porous media during transient flow. *J. Hydrol.* 377, 112-119.  
631 <https://doi.org/10.1016/j.jhydrol.2009.08.011>.
- 632 Zhuang, J., Goeppert, N., Tu, C., McCarthy, J.F., Perfect, E., McKay, L.D., 2010. Colloid  
633 transport with wetting fronts: Interactive effects of solution surface tension and ionic  
634 strength. *Water Res.* 44, 1270-1278. <https://doi.org/10.1016/j.watres.2009.12.012>.
- 635

636 **Table 1.** Model fitted parameters for silica-shelled silver nanoparticle breakthrough from columns

| Silica-shelled silver nanoparticle                   | Sand  | Geothite-coated sand |
|------------------------------------------------------|-------|----------------------|
| Maximum solid phase concentration ( $N_c$ $M^{-1}$ ) | 0.560 | 12.000               |
| Attachment coefficient ( $\text{min}^{-1}$ )         | 0.007 | 0.100                |
| Detachment coefficient ( $\text{min}^{-1}$ )         | 0.001 | 0.0003               |

637  
638  
639  
640  
641  
642  
643  
644  
645

**Table 2.** Model fitted parameters for 2,6-DFBA and SSSNP breakthrough from water-stable soil aggregate columns before (Pre-) and after (Post-) Fe(III)-bioreduction.

| Tracer   | Parameter                             | $\text{Fe(III)}$ -bioreduction phase (20 d) |                      | $\text{Fe(III)}$ -bioreduction phase (60 d) |       |          |       |          |       |
|----------|---------------------------------------|---------------------------------------------|----------------------|---------------------------------------------|-------|----------|-------|----------|-------|
|          |                                       | #Pre                                        | *Post                | Column A                                    |       | Column B |       | Column C |       |
| Tracer   | Parameter                             | #Pre                                        | *Post                | Pre                                         | Post  | Pre      | Post  | Pre      | Post  |
| 2,6-DFBA | $D$ (cm)                              | 1.12                                        | 0.93                 | 0.89                                        | 0.84  | 0.85     | 0.82  | 0.84     | 0.83  |
|          | $K_d$ ( $\text{cm}^3\text{mg}^{-1}$ ) | 0.086                                       | 0.0063               | 0.014                                       | 0.011 | 0.041    | 0.031 | 0.027    | 0.001 |
|          | $S_{\text{max}}$                      | 23.6                                        | 5.55                 | $\phi$ -                                    | -     | -        | -     | -        | -     |
| SSSNP    | Att. Coeff. ( $\text{min}^{-1}$ )     | 0.046                                       | 0.026                | -                                           | -     | -        | -     | -        | -     |
|          | Detach Coeff. ( $\text{min}^{-1}$ )   | $3 \times 10^{-6}$                          | $7.7 \times 10^{-4}$ | -                                           | -     | -        | -     | -        | -     |

$\text{§}$ Data were collected from a single column.

$\text{\#}$ Tracer transport experiment before stimulation of Fe(III)-bioreduction by injection of acetate.

$\text{*}$ Tracer transport experiment after stimulation of Fe(III)-bioreduction by injection of acetate.

$\text{\phi}$ Breakthrough of SSSNP colloids was not detected in either the treated or control columns.

$D$  is dispersivity.

$K_d$  is sorption coefficient.

$S_{\text{max}}$  [ $N_c$   $M^{-1}$ ] is the maximum solid phase concentration of SSSNP.

646



647

648

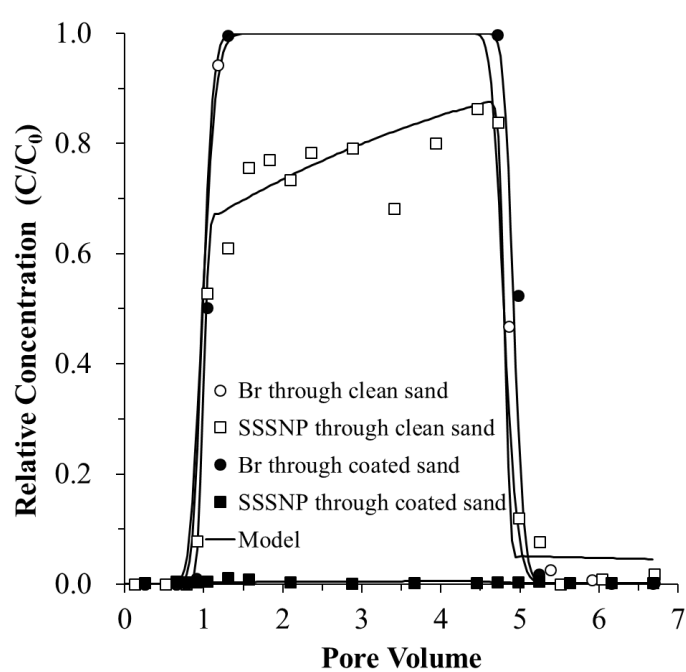

649

650 **Fig. 1.** Transport of bromide and silica-shelled silver nanoparticles (SSSNP) through goethite-  
651 coated and uncoated sands. The concentrations of bromide and SSSNP are shown over pore  
652 volume with columns flushed using KCl solution (0.67 mM, pH 6.5).

653

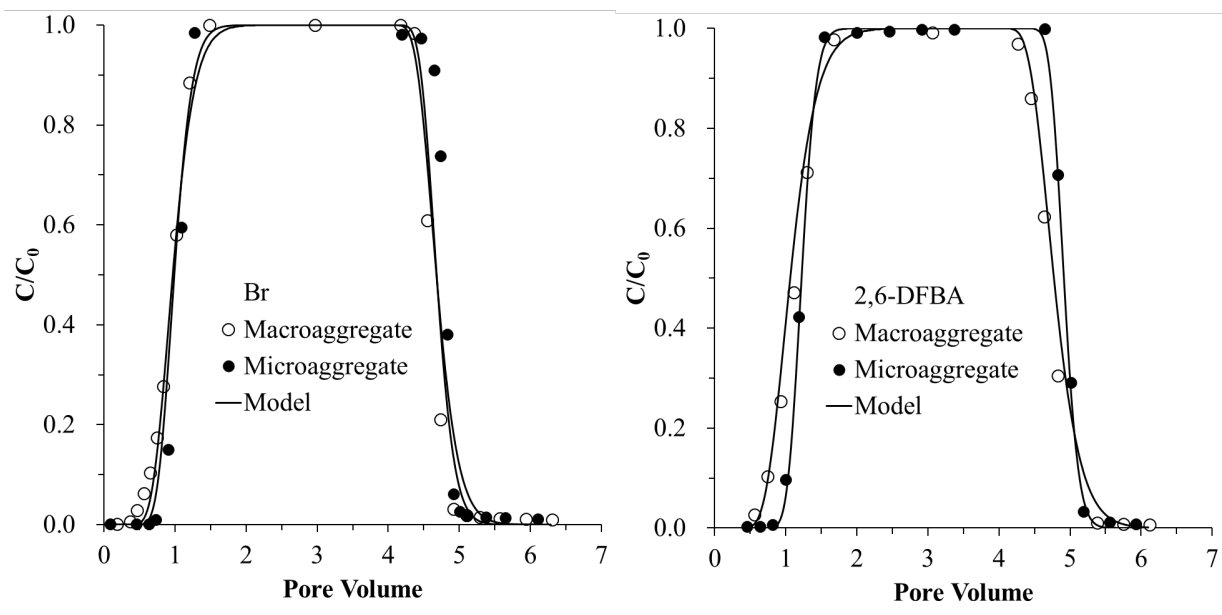

655 **Fig. 2.** Transport of bromide and DFBA through columns packed with water-stable  
656 macroaggregates (250-2,000  $\mu\text{m}$ ) or water-stable microaggregates (53-250  $\mu\text{m}$ ) under oxic  
657 conditions without Fe(III)-bioreduction.  
658

659  
660  
661

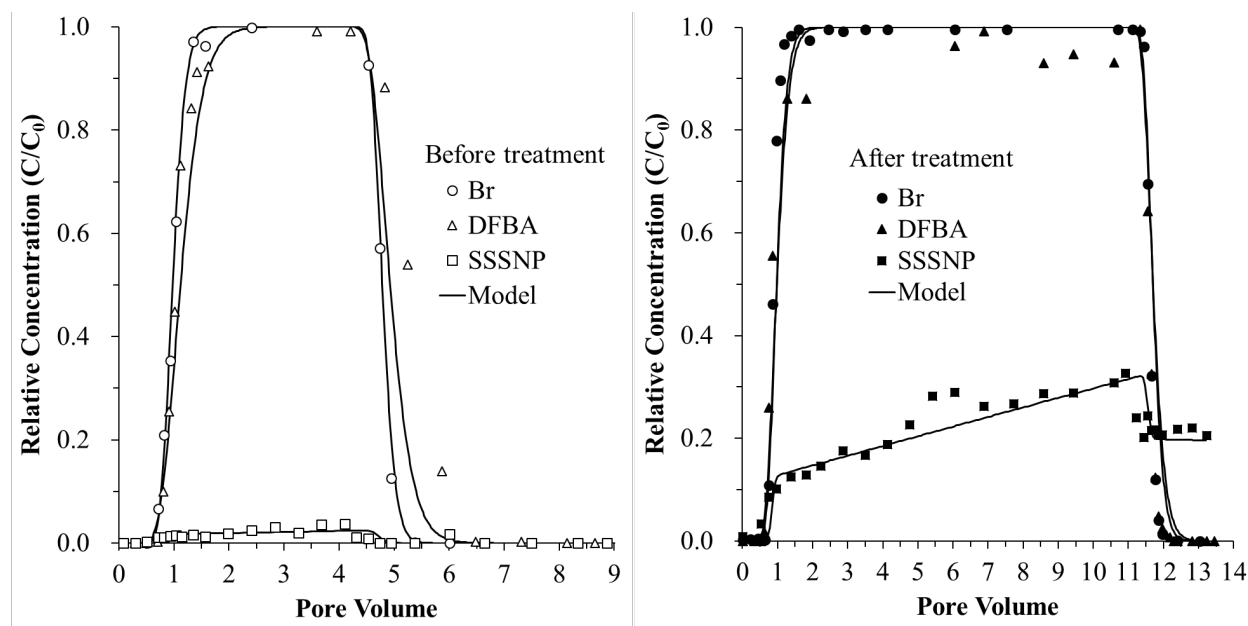

663 **Fig. 3.** Breakthrough curves of tracers ( $\text{Br}^-$  and DFBA) and silica-shelled silver nanoparticles  
664 (SSSNP) from columns packed with water-stable soil aggregates before and after the 20-day  
665 Fe(III)-bioreduction.

666

667

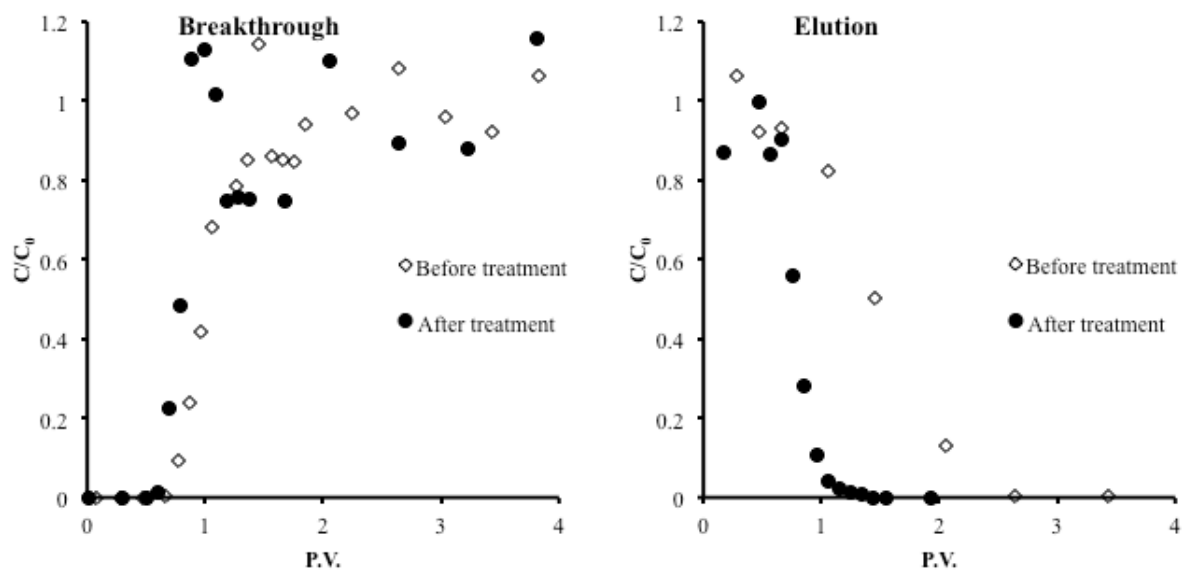

**Fig. 4.** Expanded view of breakthrough and elution profiles of DFBA before and after the 20-day Fe(III)-bioreduction phase.

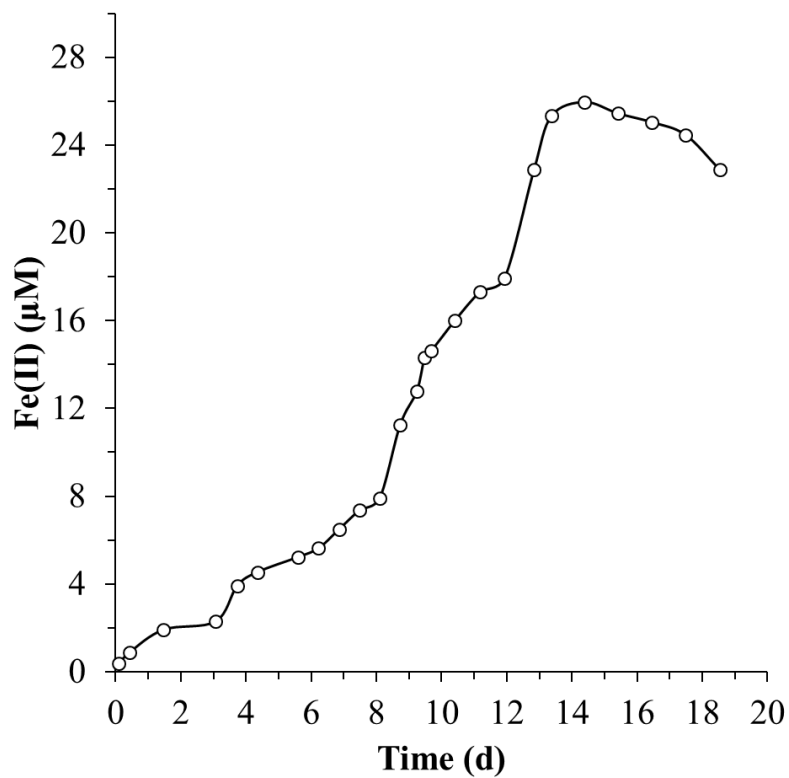

668

669 **Fig. 5.** Effluent Fe(II) concentration during the acetate injection phase of the 20-day Fe(III)-  
670 bioreduction column experiment.

671

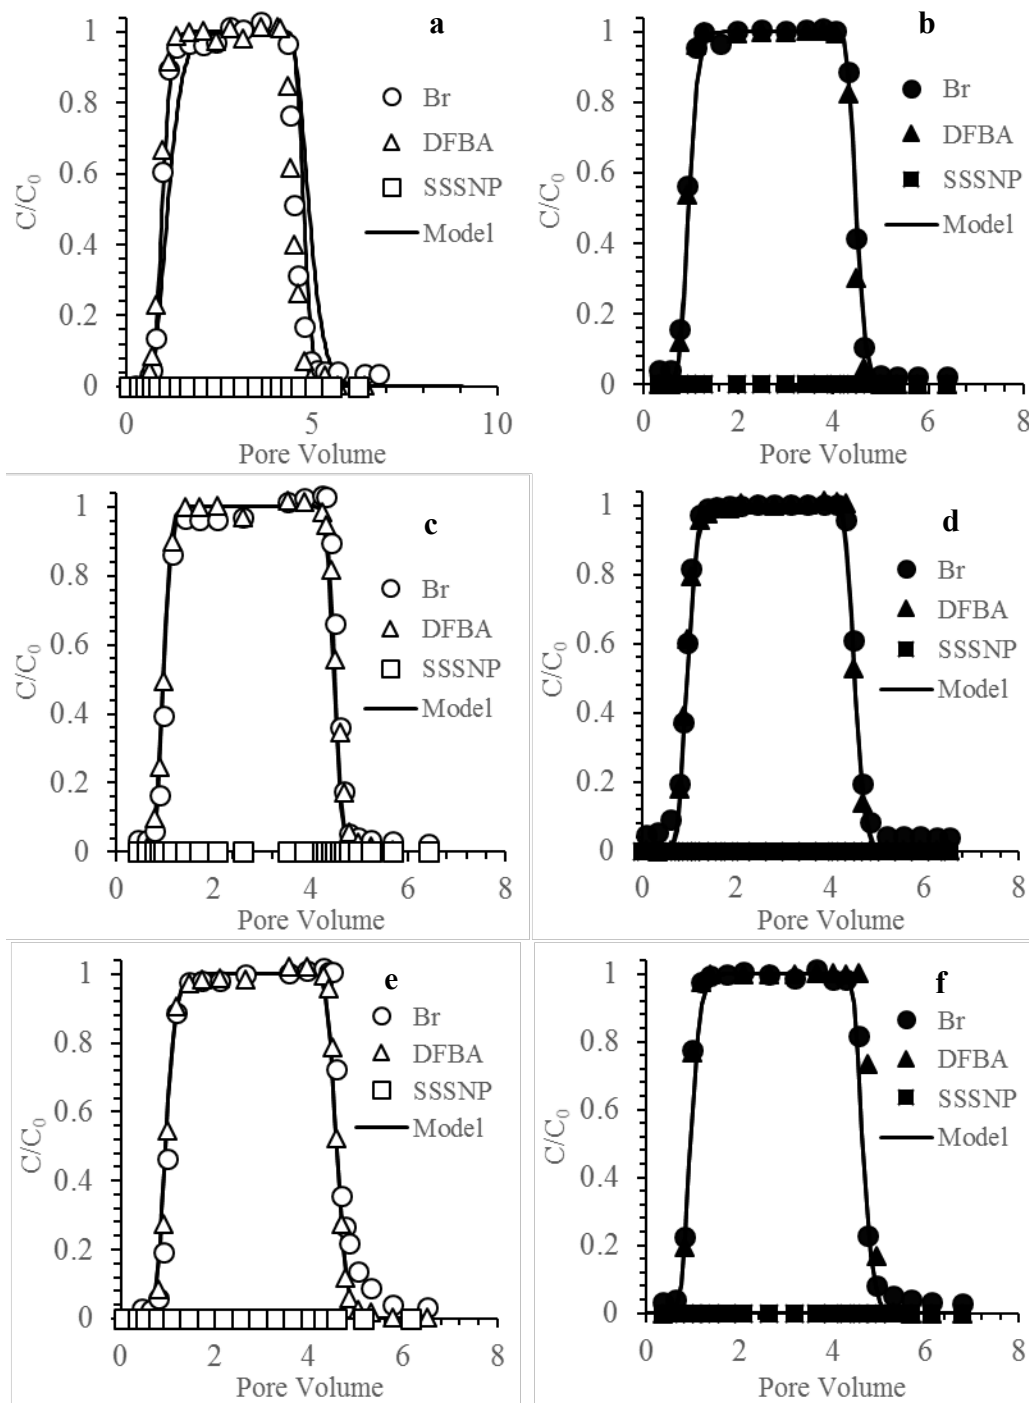

672

673 **Fig. 6.** Breakthrough curves of tracers (Br<sup>-</sup> and DFBA) and silica-shelled silver nanoparticles  
674 (SSSNP) in pre- (left, a, c, e) and post-acetate (right, b, d, f) treatment transport experiments for  
675 60-day Fe(III)-bioreduction treatment in the columns packed with water-stable macroaggregates  
676 (250-2,000  $\mu\text{m}$ ). The plots of a, b, c, and d are breakthrough curves from replicate acetate-treated  
677 columns while the plots of e and f are breakthrough curves from the control column that did not  
678 receive acetate injection.

679

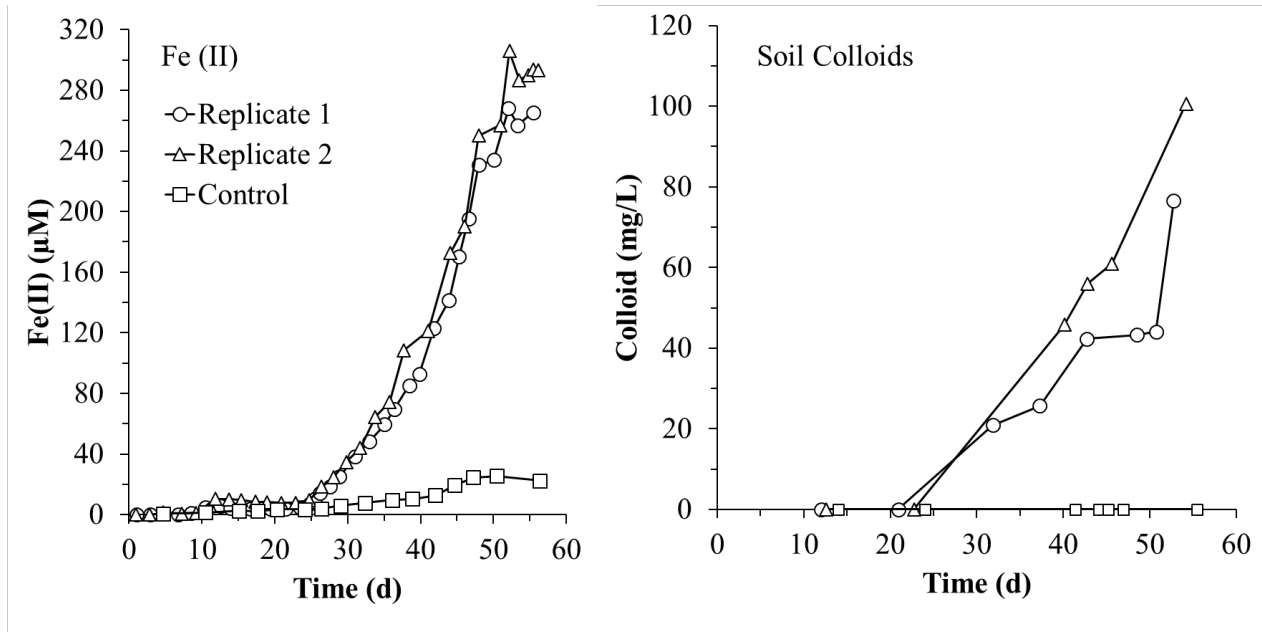

680 **Fig. 7.** Concentrations of released Fe(II) and soil colloids in the effluent during the acetate  
681 injection phase of the 60-day Fe(III)-bioreduction column experiments.

682

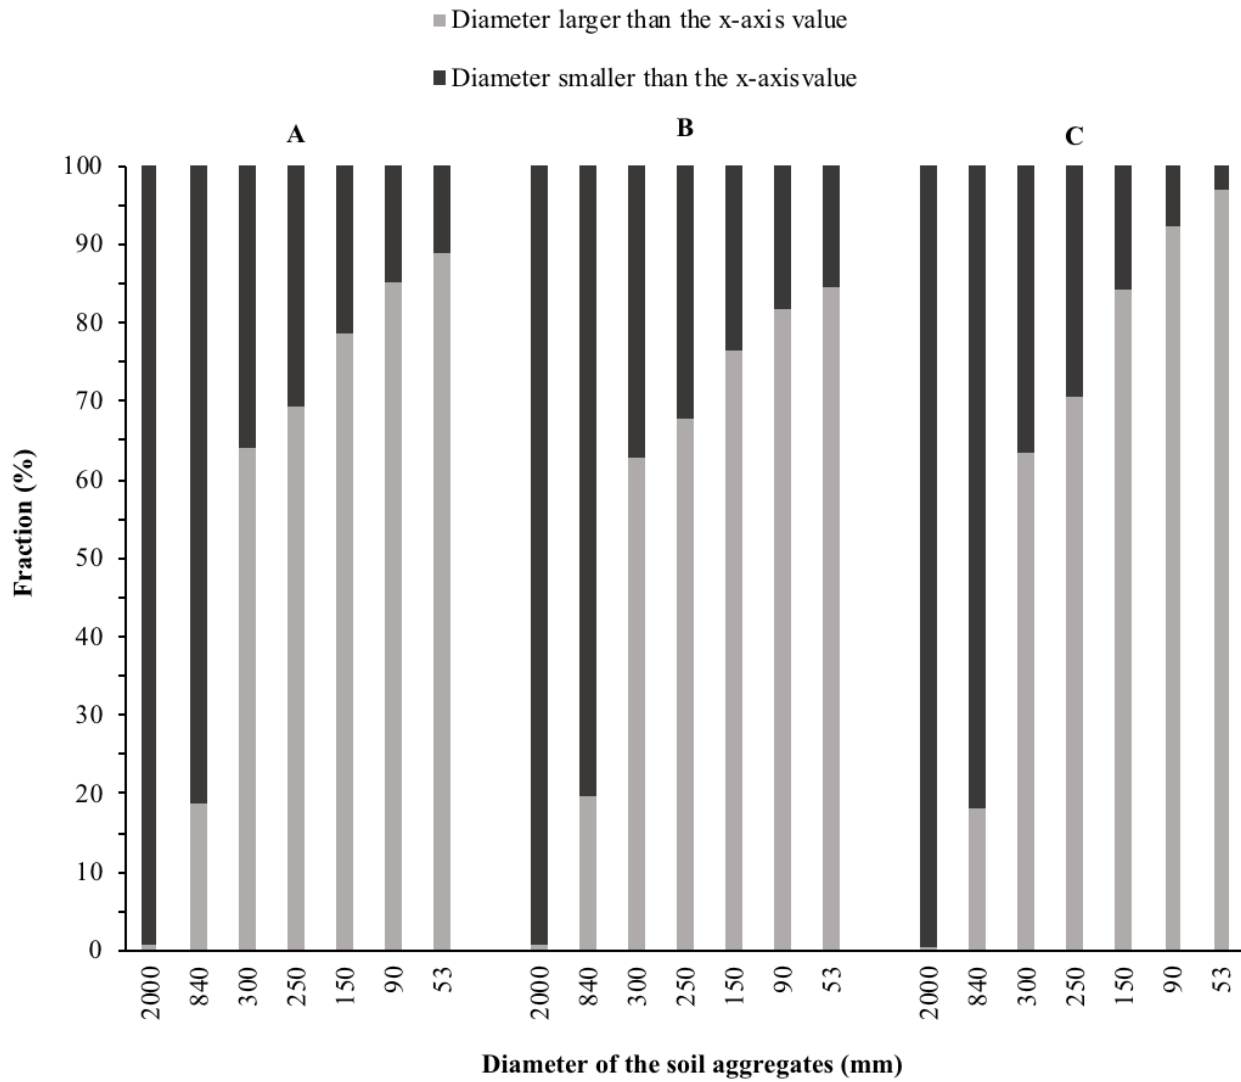

683

684

685 **Fig. 8.** The aggregate size distribution of the soil aggregates from the aggregate-packed columns  
686 after the conclusion of the 60-day Fe(III)-bioreduction experiment. Columns A and B received  
687 acetate in the feed solution over a 60-day period. Column C was the control column without  
688 acetate injection.



689

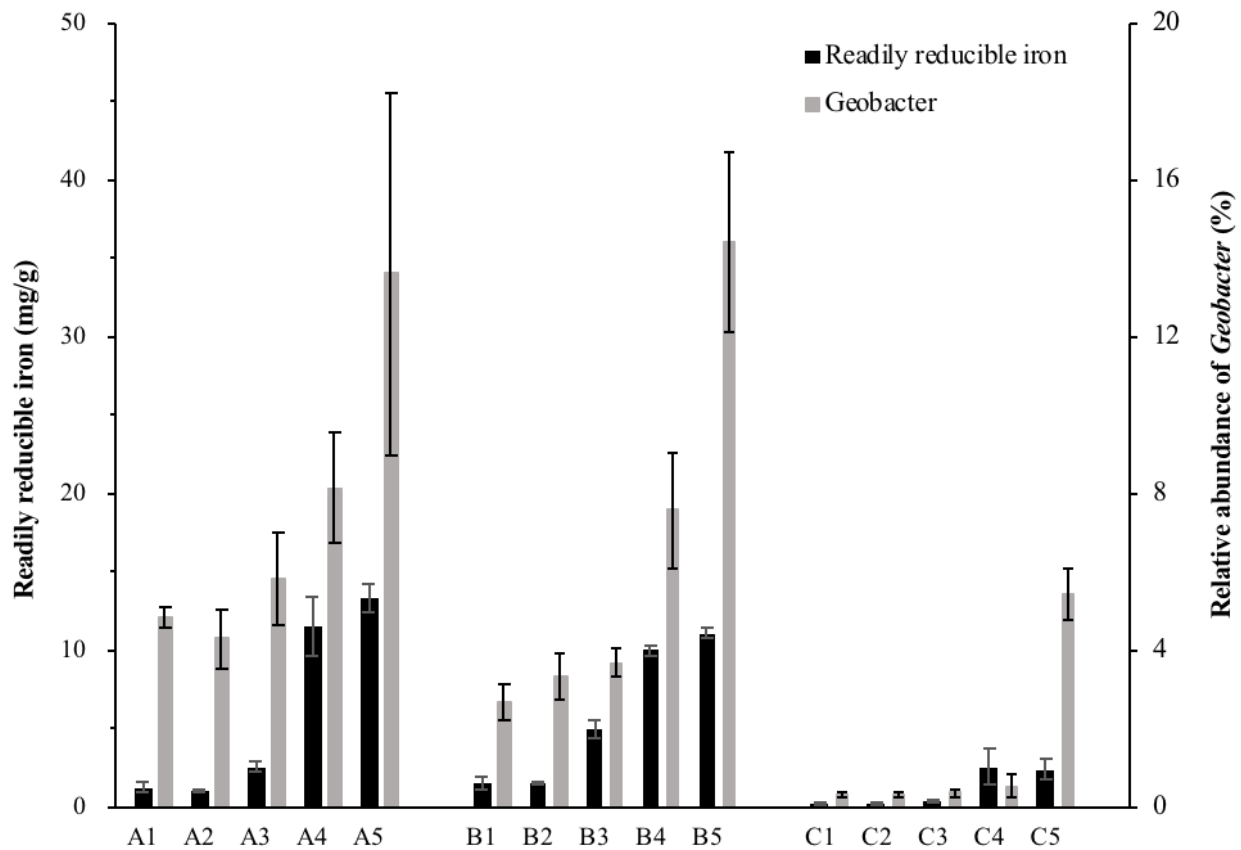

690

691 **Fig. 9.** Readily reducible iron content and distribution of iron-reducing bacteria (*Geobacter*  
692 determined via sequencing of 16S rRNA gene libraries prepared from soil samples) in five  
693 depths of the aggregate-packed columns at the conclusion of the 60-day Fe(III)-bioreduction  
694 column experiment. Columns A and B received acetate in the feed solution over a 60-day period.  
695 Column C, the control column, did not receive any acetate. Sections 1 and 5 represent samples  
696 collected near the effluent and influent ends of the columns, respectively.

697

698  
699  
700

## Supplementary Materials

**Table S1.** Experimental protocols of transport tests in columns.

| Transport experiments                                                                                                                    | Columns No. | Porous media                  | Procedures                                                                                                                                                                                                                                                                                                                                                                                                                                                                                                                                                                                                                                                                                                                                                                                                                                                                                 |
|------------------------------------------------------------------------------------------------------------------------------------------|-------------|-------------------------------|--------------------------------------------------------------------------------------------------------------------------------------------------------------------------------------------------------------------------------------------------------------------------------------------------------------------------------------------------------------------------------------------------------------------------------------------------------------------------------------------------------------------------------------------------------------------------------------------------------------------------------------------------------------------------------------------------------------------------------------------------------------------------------------------------------------------------------------------------------------------------------------------|
| Investigation of effects of iron oxide on the transport of tracers and nanoparticles                                                     | 1           | Goethite-coated silica        | 1. Two columns were wet-packed with uncoated and goethite-coated sands, respectively.                                                                                                                                                                                                                                                                                                                                                                                                                                                                                                                                                                                                                                                                                                                                                                                                      |
|                                                                                                                                          | 2           | Uncoated silica               | 2. The sand columns were flushed with KCl solution (0.67 mM, pH 6.5) prior to the tracer experiments.<br>3. The input solution for the sand columns contained Br- (50 mg/L KBr), DFBA (40 mg/L), and SSSNP (40 ug/L) in the KCl solution. 4. Breakthrough and elution data of three tracers were collected.                                                                                                                                                                                                                                                                                                                                                                                                                                                                                                                                                                                |
|                                                                                                                                          | 3           | Macroaggregates (250-2000 μm) | 1. Five columns were dry-packed with <i>Geobactor</i> -inoculated soil macroaggregates under anoxic conditions.                                                                                                                                                                                                                                                                                                                                                                                                                                                                                                                                                                                                                                                                                                                                                                            |
| Evaluations of the effect of Fe(III)-bioreduction on the transport of tracers (bioreduction duration of 20 days and 60 days, separately) | 4           | Macroaggregates (250-2000 μm) | 2. The soil aggregate columns were flushed with carbon dioxide to replace the air in soil pores, followed by flushing with KCl solution (0.67 mM, pH 6.5) to achieve fully saturated conditions without remaining gas pockets.                                                                                                                                                                                                                                                                                                                                                                                                                                                                                                                                                                                                                                                             |
|                                                                                                                                          | A           | Macroaggregates (250-2000 μm) | 3. Each column experiment consisted of three phases with constant total ionic strength of solutions (2 mM):                                                                                                                                                                                                                                                                                                                                                                                                                                                                                                                                                                                                                                                                                                                                                                                |
|                                                                                                                                          | B           | Macroaggregates (250-2000 μm) | <b>Phase 1:</b> Tracer transport experiments with the KCl input solution containing Br- (85 mg/L KBr), DPBA (50 mg/L), and SSSNP (40 μg/L). Breakthrough and elution data of three tracers were collected.<br><b>Phase 2:</b> Columns were flushed with artificial groundwater solution (AGW), which had a total ionic strength of 2 mM and a pH value of 7.5, consisting of CaCl <sub>2</sub> (0.075 mM), MgCl <sub>2</sub> (0.082 mM), KCl (0.051 mM), NaHCO <sub>3</sub> (1.5 mM), trace elements, and vitamins. The AGW for bioreduction-stimulated column contained acetate, while the AGW for two control columns was prepared without acetate. The bioreduction phase lasted for 20 days in two columns (acetate-treated column 3 and control column 4); while the other three columns (acetate-treated columns A and B, and control column C) experienced 60 days of bioreduction. |
|                                                                                                                                          | C           | Macroaggregates (250-2000 μm) | <b>Phase 3:</b> The same tracer transport experiments with Phase 1 were performed at the conclusion of bioreduction phase.                                                                                                                                                                                                                                                                                                                                                                                                                                                                                                                                                                                                                                                                                                                                                                 |

|                                                                                           |   |                                           |                                                                                                                                                                                                                                                                                                                                                                                                                                                         |
|-------------------------------------------------------------------------------------------|---|-------------------------------------------|---------------------------------------------------------------------------------------------------------------------------------------------------------------------------------------------------------------------------------------------------------------------------------------------------------------------------------------------------------------------------------------------------------------------------------------------------------|
| Examinations of the effects of aggregate size fractions on the transport of three tracers | 5 | Macroaggregates (250-2000 $\mu\text{m}$ ) | 1. Two columns were dry packed with microaggregates and macroaggregates, respectively.<br>2. The soil aggregate columns were flushed with carbon dioxide, followed by flushing with KCl solution (0.67 mM, pH 6.5) to achieve fully saturated conditions without remaining gas pockets.<br>3. Tracer experiments with Br <sup>-</sup> (50 mg/L KBr), DFBA (40 mg/L), and SSSNP (40 $\mu\text{g/L}$ ) in the KCl solution were performed in each column. |
|                                                                                           | 6 | Microaggregates (53-250 $\mu\text{m}$ )   | 4. Breakthrough and elution data of three tracers were collected.                                                                                                                                                                                                                                                                                                                                                                                       |

701  
702

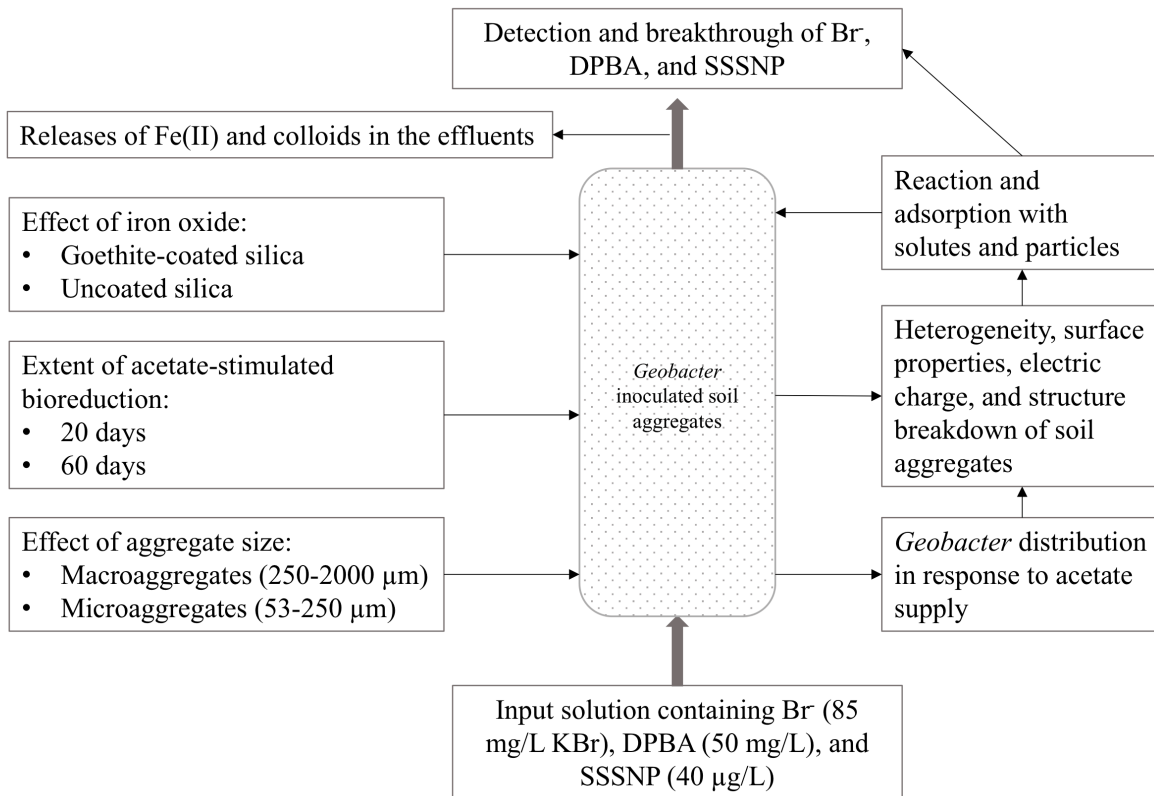

703  
704 **Fig. S1. The schematic diagram of column experiments.**
